# Supplementary material for: The formation and growth of calcium sulfate crystals through oxidation of SO2by O3on size-resolved calcium carbonate
Source: Royal Society of Chemistry journal article supplement (doi:10.1039/c8ra02050g), 2018-01-01
Supplement: c8ra02050g1.pdf [file c8ra02050g1.pdf]

## The formation and growth of calcium sulfate crystals through oxidation of SO<sub>2</sub> by O<sub>3</sub> on the size-resolved calcium carbonate†

Ying Zhang,<sup>ab</sup> Shengrui Tong,<sup>\*a</sup> Maofa Ge,<sup>\*abc</sup> Bo Jing,<sup>a</sup> Siqi Hou,<sup>ab</sup> Fang Tan,<sup>ab</sup> Yi Chen,<sup>ab</sup> Yucong Guo<sup>a</sup> and Lingyan Wu<sup>d</sup>

<sup>a</sup>State Key Laboratory for Structural Chemistry of Unstable and Stable Species, Institute of Chemistry, Chinese Academy of Sciences, Beijing 100190, P. R. China.

<sup>b</sup>University of Chinese Academy of Sciences, Beijing 100049, P. R. China.

<sup>c</sup>CAS Research/Education Center for Excellence in Molecular Sciences, Beijing 100190, P. R. China.

<sup>d</sup>State Key Laboratory of Severe Weather & Key Laboratory of Atmospheric Chemistry of CMA, Chinese Academy of Meteorological Sciences, Beijing 100081, P. R. China.

Correspondence and requests for materials should be addressed to S.T. (email: tongsr@iccas.ac.cn) or M.G. (email: gemaofa@iccas.ac.cn)

Two Figures (S1-S2), 3 pages total

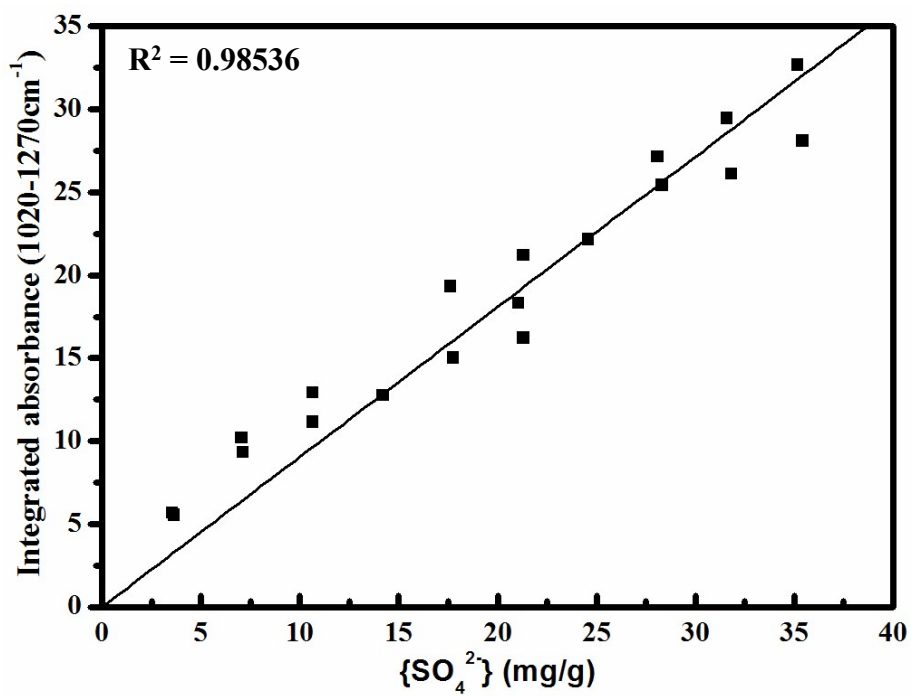

Fig. S1. Calibration curve for the integrated absorbance versus the concentration of sulfate.

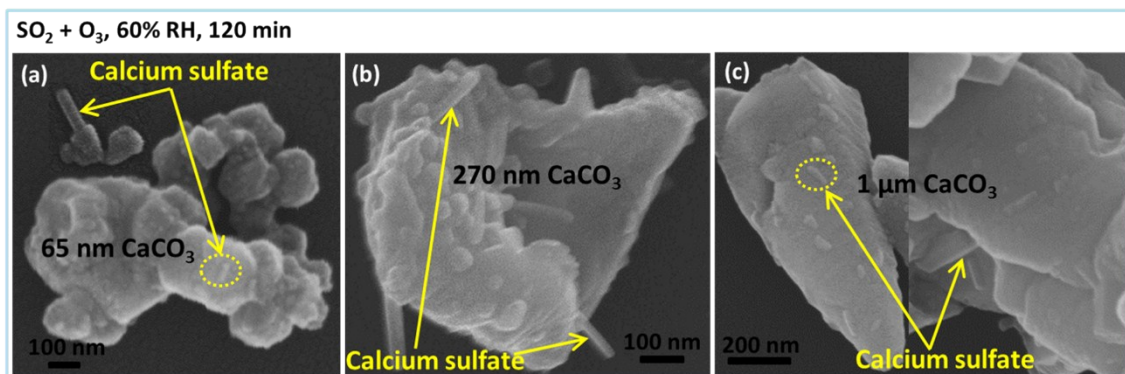

**Fig. S2.** The SEM pictures of three kinds of samples (a) 65 nm CaCO<sub>3</sub>, (b) 270 nm CaCO<sub>3</sub> and (c) 1 μm CaCO<sub>3</sub> after SO<sub>2</sub> and O<sub>3</sub> were exposed simultaneously at 298 K and 60% RH for 120 min.
